# Supplementary material
Source: publisher figshare collection journal article supplement (https://sage.figshare.com/ndownloader/files/14147693)
Supplement: Supplementary file 1 [file 14147693]

## Appendix 1

### 1.1.Hospital location:

☐ Beirut ☐ Mount Lebanon ☐ South Lebanon ☐ North Lebanon ☐ Bekaa ☐ Nabatieh

1.2.Type of hospital: ☐ Public ☐ Private ☐ University

1.3.Number of beds served by the hospital:.....

1.4.Number of ICU/CCU beds served by the hospital:.....

### 1.6.Is there a specialty unit in your hospital?

☐ Oncology ☐ Transplantation ☐ Burns unit ☐ Psychiatry ☐ Geriatric ☐ Other: \_\_\_\_\_

### 1.7.Pharmacy opening hours per day

☐ Monday to Friday Number of hours per day : \_\_\_\_\_

☐ Saturday Number of hours per day : \_\_\_\_\_

☐ Sunday Number of hours per day : \_\_\_\_\_

1.8.Is the pharmacy open 24 hours service? ☐ Yes ☐ No

1.9.Is there a pharmacist night shift services in the hospital? ☐ Yes ☐ No

1.10.Is there an on-call pharmacy service? ☐ Yes ☐ No

☐ Chief pharmacist ☐ Assistant pharmacist ☐ Clinical pharmacist ☐ Pharmacy technician

1.11.Is your hospital affiliated to any of the following teaching programs? (ie. routine training site for students, residents, interns, or other trainees?)

☐ University School of Pharmacy ☐ Nursing School ☐ School of medicine

☐ None ☐ Other: \_\_\_\_\_

### 1.12.Is the Pharmacy Department involved in the training any of these groups?

☐ Undergraduate pharmacists ☐ Pharm.D ☐ Pharmacy support staff

☐ None ☐ Other: \_\_\_\_\_

## Part 2: Pharmacy staff Workforce

**2.1. Pharmacist Gender:** ☐ Number of Females:..... ☐ Number of Males:.....

**2.2. Non-Pharmacy Staff Gender:** ☐ Number of Females:..... ☐ Number of Males:.....

### 2.3. Pharmacist qualifications

|                      | B.S. Pharm | Pharm.D | MS | MBA | MPH | Post-graduate certificate or diploma |
|----------------------|------------|---------|----|-----|-----|--------------------------------------|
| Chief pharmacist     |            |         |    |     |     |                                      |
| Assistant pharmacist |            |         |    |     |     |                                      |
| Oncology pharmacist  |            |         |    |     |     |                                      |
| Research pharmacist  |            |         |    |     |     |                                      |
| Clinical pharmacist  |            |         |    |     |     |                                      |

### 2.3. Non-Pharmacist staff qualifications

|             | Number of Non-Pharmacist staff | Specify |
|-------------|--------------------------------|---------|
| Diploma     |                                |         |
| Certificate |                                |         |
| Other       |                                |         |

### 2.4. Age profile: Number of Pharmacist in the following age range

| Under 35 | 35-44 | 45-54 | 55-64 | 65 and above |
|----------|-------|-------|-------|--------------|
|          |       |       |       |              |

### 2.5. Working schedule

|           | Pharmacist  | # Years of practice | # Non Pharmacist staff | # Years of practice |
|-----------|-------------|---------------------|------------------------|---------------------|
| Full time | Chief:      |                     |                        |                     |
|           | Assistants: |                     |                        |                     |
|           | Clinical:   |                     |                        |                     |

|           |  |  |  |  |
|-----------|--|--|--|--|
| Part time |  |  |  |  |
|-----------|--|--|--|--|

## 2.6. Organizational chart: Chief pharmacist reports to:

☐General director or CEO      ☐Medical director /CMO☐Financial director/CFO   ☐Other:.....

## Part 3: System /Services

### 3.1. Which of the following services are under the control of a pharmacist?

|                                                                           |  |                                                                   |  |
|---------------------------------------------------------------------------|--|-------------------------------------------------------------------|--|
| Reviewing medication order                                                |  | Selection, Purchasing and procurement of sterile medical supplies |  |
| Disease prevention and wellness programs (smoking cessation, vaccination) |  | Distribution of sterile medical supplies                          |  |
| Consultation on medication management and uses                            |  | Blood derivatives                                                 |  |
| Restricted Antibiotics and Antimicrobial stewardship                      |  | Investigational drugs                                             |  |
| Medications selection and procurement                                     |  | Purchasing diagnostic tests                                       |  |
| Medication dispensing                                                     |  | Purchasing Medical gases                                          |  |
| Waste management                                                          |  | Purchasing radiopharmaceutical products                           |  |
| IV admixture hazardous medications                                        |  | TPN admixture                                                     |  |
| Compounding IV admixtures                                                 |  | Infection control                                                 |  |
| Pharmacokinetic consultation                                              |  | Patient care rounds                                               |  |
| Pharmacotherapy consults                                                  |  | Enteral nutrition                                                 |  |
| Patient counseling                                                        |  | Other:                                                            |  |

**3.2.Is Pharmacy documenting in the medical record?** ☐Yes   ☐No

### 3.3.How are medication orders received by the pharmacy department?

☐Written physician order sent by fax or scan   ☐A copy of a written physician order

☐Computerized Physician order entry☐Transcribed physician order by a nurse

### 3.4.How are your clinical pharmacy services organized?

☐Centralised: pharmacists visit patient care areas at least once daily

☐Centralised: pharmacists visit patient care areas regularly, but not every day

☐Decentralised: pharmacists spend at least 50% of their time in patient care areas

☐Other: .....

☐ Not applicable:.....

**3.5. Are there any pharmacist-led outpatient clinics in your hospital?** ☐ Yes Specify:.....

☐ No

**3.6. What standards do you operate to in relation to compounding/IV preparation, if relevant?**

☐ USP 797      ☐ USP 800      ☐ GMP      ☐ Other:.....

**3.7. Is there a formulary in place in your hospital?** ☐ Yes      ☐ No      ☐ In progress

**3.8. If Yes, how often is the formulary updated?** ☐ Every year      ☐ Every two years      ☐ > every two years

**3.9. Who is the governing body for formulary management and updates?**

☐ P&T      ☐ Chief pharmacist ☐ General director ☐ Other:.....

**3.10. Is the pharmacy department team responsible for monitoring formulary compliance?** ☐ Yes

☐ No

**3.11. Does the hospital have an external quality certification? (e.g. ISO, JCI...)**

☐ Yes Specify:.....      ☐ No      ☐ In progress

**3.12. Does your pharmacy issue any of the following educational materials?**

Newsletter, how often: .....

☐ Flyers/Brochures, how often: .....

☐ Guidelines/Charts/Protocols: .....

☐ Other, please specify & how often: .....

**Which ones are for external circulation targeting the public and patients?** .....

## Part 4: Budget

**4.1. Does the chief pharmacist participate in setting the yearly pharmacy budget?** ☐ Yes      ☐ No

**4.2. Does the pharmacy have a continuing education budget for:**

a) Chief Pharmacist, b) All other pharmacists, c) Pharmacy technicians

## Part 5: Quality management

**5.1. Does the Pharmacy participate in setting the strategic planning of the hospital?** ☐ Yes      ☐ No

**5.2. Does your Pharmacy have a designated Quality champion coordinating between the Pharmacy and the Quality department?** ☐ Yes      ☐ No

**Who?**.....

5.3. Is there an annual Quality Improvement Plan (QIP) targeting the strategic direction and the goals of the hospital? ☐ Yes ☐ No

5.4. If yes, does your QIP use SMART objectives and relevant KPIs for continuous improvement of the pharmacy department? ☐ Yes ☐ No

5.5. How often is your QIP monitored? .....

## Part 6: Interprofessional relationships

6.1. Do hospital leaders support the role of pharmacists in patient care? ☐ Yes ☐ No ☐ Partly

6.2. Which, of the following multidisciplinary teams or committees include(s) a pharmacist or other representative of the pharmacy department?

☐ Antimicrobial stewardship ☐ P&T ☐ Ethics/research ☐ Infection control ☐ Quality improvement

☐ Health and safety ☐ Medication safety ☐ Risk management ☐ None

☐ Other: .....

6.3. Which of the previously mentioned committees is chaired by chief pharmacist? .....

6.4. Is there collaboration between the hospital pharmacy and the attending physician for patients following discharge? ☐ Planned discharge services ☐ Nominated community pharmacy ☐ None

6.5. Does the pharmacy perform medication reconciliation?

☐ upon admission ☐ Upon transfer ☐ Upon discharge ☐ Not applicable

☐ Yes, for all patients ☐ Yes, for high risk patient's ☐ For ER patients

6.6. Does the pharmacy collaborate with other hospital pharmacies for patient care?

☐ Yes, occasional ☐ Yes, routinely ☐ No

## Part 7: Technology

7.1. Which of the following computer support technology is available in your pharmacy department?

| Computer systems                                                                                                                                 | Available |
|--------------------------------------------------------------------------------------------------------------------------------------------------|-----------|
| Intranet                                                                                                                                         |           |
| Internet                                                                                                                                         |           |
| Online medicines information and resources                                                                                                       |           |
| Integrated clinical decision support tool e.g Drug interaction, Drug information database, Medication errors reporting software, Patient profile |           |

### **7.2.Computer technology in your department serves for :**

- ☐Receiving and processing physician orders☐Billing and invoicing☐Stock control and distribution
- ☐Interdepartmental Communication☐Research and use of databases☐Patient follow-up
- ☐Screening drug interaction☐Patient medication profiling☐Drug Information
- ☐Dosage calculation☐Preparing financial report☐Data analysis
- ☐Electronic health record☐Medication errors reporting reports
- ☐Intervention reporting system
